# Supplementary material for: Efficacy of a certified modular ultrasound curriculum
Source: Springer Nature journal article supplement (doi:10.1007/s00101-020-00730-9), 2020-02-13
Supplement: MOESM2 [file 17698098]

## INTERAKTIVES QUIZ ÜBER DIE AFS MODULE 4+5

AFS Modul 4 – (Transthorakale) Echokardiografie

AFS Modul 5 – Thorakoabdominelle Sonografie (E-FAST plus)

### ANLEITUNG

Gleich werden Ultraschallbilder bzw. Videosequenzen gezeigt.

- Es sind Mehrfachantworten möglich.
- Bitte den ausgefüllten Antwortbogen ins Studienpostfach legen bzw. per Hauspost schicken.
- Herzlichen Dank fürs Mitmachen und viel Spaß!

### FRAGE 1

Welche Aussagen zum nebenstehenden Video treffen zu?

- A. Normalbefund
- B. Leichtgradig eingeschränkte LV-EF (ca. 45%)
- C. Mittelgradig eingeschränkte LV-EF (ca. 35%)
- D. Hochgradig eingeschränkte LV-EF (ca. 20%)
- E. Die LV-EF ist nicht beurteilbar.

### FRAGE 2

Was ist auf dem Video zu erkennen?

- A. Pleuraerguss
- B. Perikarderguss mit deutlicher Kompression des RV
- C. Perikarderguss ohne wesentliche hämodynamische Auswirkungen
- D. Deutlich eingeschränkte RV-EF
- E. Deutlich eingeschränkte LV-EF

### FRAGE 3

Welche Aussagen zum nebenstehenden Video treffen zu?

- A. Apikale 4-KB Anlotung
- B. Parasternale lange Achse (long axis, LAX) Anlotung
- C. Parasternale kurze Achse (short axis, SAX) Anlotung
- D. Subcostale lange Achse (long axis, LAX) Anlotung

E. Subcostale kurze Achse (short axis, SAX) Anlotung

#### FRAGE 4

Welche Aussagen zum nebenstehenden Video treffen zu?

- A. Parasternale LAX Anlotung
- B. Parasternale SAX Anlotung
- C. Subcostale Anlotung
- D. Apikale Anlotung (4-KB)
- E. Apikale Anlotung (2-KB)

#### FRAGE 5

Was ist im Video zu sehen?

- A. Die luftgefüllte Lunge
- B. Die atelektatische Lunge
- C. Das Zwerchfell
- D. Aszites
- E. Ein Pleuraerguss

#### FRAGE 6

Was ist im unteren Teil des Bildes gezeigt?

- A. B-Mode Bild
- B. M-Mode Bild
- C. Lungenpunkt
- D. Lungenpuls
- E. Ein physiologischer Befund

#### FRAGE 7

Welche Aussagen zum nebenstehenden Video treffen zu?

- A. Normalbefund
- B. Leichtgradig eingeschränkte LV-EF (45%)
- C. Mittelgradig eingeschränkte LV-EF (35%)
- D. Hochgradig eingeschränkte LV-EF (20%)
- E. Die LV-EF ist nicht beurteilbar.

#### FRAGE 8

Welche Aussagen zum nebenstehenden Video treffen zu?

- A. Normalbefund
- B. Hypermobiler RV
- C. Mittelgradig eingeschränkte LV-EF (35%)
- D. Leichtgradige eingeschränkte LV-EF (45%)
- E. Deutlich vergrößerter linker Vorhof

#### FRAGE 9

Was ist auf dem Video zu sehen?

- A. Normalbefund
- B. Mittelgradig eingeschränkte LV-EF
- C. Zeichen einer Rechtsherzbelastung
- D. Vermutlich Pathologie der Mitralklappe
- E. Zeichen einer Lungenarterienembolie

#### FRAGE 10

Was ist im Video zu sehen?

- A. Die Leber
- B. Die Milz
- C. Das sog. „Vorhangphänomen“
- D. Ein Pleuraerguss
- E. Ein physiologischer Befund

#### FRAGE 11

Was zeigt das nebenstehende Video?

- A. Einen Normalbefund
- B. V. cava inferior
- C. Gestaute Lebervenen
- D. Zeichen einer  
Rechtsherzinsuffizienz
- E. Langstreckiges Aortenaneurysma

#### FRAGE 12

Was ist im Video zu sehen?

- A. Längs angelotete Rippen
- B. Pleuragleiten
- C. Pneumothorax
- D. Lungenpuls
- E. Ein pathologischer Befund

#### FRAGE 13

Was zeigt das nebenstehende Bild?

- A. eine Niere mit Zysten
- B. Harnstau bei Ablaufstörung im Bereich des Nierenbeckens
- C. Harnstau bei Ablaufstörung im Bereich des proximalen Ureters
- D. Harnstau bei Ablaufstörung im Bereich des distalen Ureters
- E. einen Normalbefund

#### FRAGE 14

Was zeigt der untere Bereich des Bildes aus dem Bereich des Thorax?

- A. M-Mode
- B. B-Mode
- C. Einen Lungenpuls
- D. Einen Lungenpunkt
- E. Das sog. „seashore“-Zeichen

#### FRAGE 15

Was ist auf dem Video zu erkennen?

- A. Pleuraerguss
- B. Perikarderguss mit deutlicher Kompression des RV
- C. Perikarderguss ohne wesentliche hämodynamische Auswirkungen
- D. Deutlich eingeschränkte RV-EF
- E. Deutlich eingeschränkte LV-EF

#### FRAGE 16

Was ist auf dem Bild zu sehen?

- A. Leber
- B. Milz
- C. Niere
- D. Morison-Pouch
- E. Koller-Pouch

#### FRAGE 17

Welche Aussagen zu dem Video treffen zu?

- A. Normalbefund
- B. Leichtgradig eingeschränkte LV-EF (45%)
- C. Mittelgradig eingeschränkte LV-EF (35%)
- D. Hochgradig eingeschränkte LV-EF (20%)
- E. Die LV-EF ist nicht beurteilbar.

#### FRAGE 18

Welche Aussagen zum nebenstehenden Video treffen zu?

- A. Normalbefund
- B. Leichtgradig eingeschränkte LV-EF (ca. 45%)
- C. Mittelgradig eingeschränkte LV-EF (ca. 30%)
- D. Hochgradig eingeschränkte LV-EF (ca. 15%)
- E. Die LV-EF ist nicht beurteilbar

#### FRAGE 19

Welche Aussagen zum nebenstehenden Video treffen zu?

- A. Parasternale LAX Anlotung
- B. Parasternale SAX Anlotung
- C. Subcostale Anlotung
- D. Apikale Anlotung (4-KB)
- E. Apikale Anlotung (2-KB)

FRAGE 20

Was zeigen die nebenstehenden Bilder?

- A. Einen Normalbefund
- B. Dieselbe anatomische Struktur in zwei Anlotungen
- C. Gestaute Lebervenen
- D. Zeichen einer Rechtsherzinsuffizienz
- E. Langstreckiges Aortenaneurysma
